# Supplementary material for: Patient-derived pancreas-on-a-chip to model cystic fibrosis-related disorders
Source: PubMed Central journal article supplement (PMC6635497; doi:10.1038/s41467-019-11178-w), 2019-07-16
Supplement: 41467_2019_11178_MOESM3_ESM.pdf [file 41467_2019_11178_MOESM3_ESM.pdf]

## Description of Additional Supplementary Files

**File name:** Supplementary Movie 1

**Description:** Formation of monolayer of PDECs from organoids. Organoids in Matrigel were transferred to a 35-mm dish following breaking down of the Matrigel. The plate was imaged using IncuCyte Zoom system (Essen Bioscience) in a cell culture incubator (5% CO<sub>2</sub>, 37°C) and time lapse images were taken every 10 minutes for 26 hours.
